# Supplementary material for: Praseodymium hydroxide/gold-supported precursor: a new strategy for preparing stable and active catalyst for the water-gas shift reaction
Source: Royal Society of Chemistry journal article supplement (doi:10.1039/d0cy01263g), 2020-01-01
Supplement: d0cy01263g1.pdf [file d0cy01263g1.pdf]

## Support Information

1

2

### 3 Praseodymium Hydroxide Precursor Supported Gold: New 4 Strategy for Preparing a Stable and Active Catalyst for the 5 Water Gas Shift Reaction

6 Junjie Shi,<sup>ab\*</sup> Hailian Li,<sup>a</sup> Weixuan Zhao<sup>a</sup>, Pengfei Qi,<sup>c</sup> Hongxin Wang<sup>a</sup>

7

8 <sup>a</sup> Shandong Applied Research Centre of Gold Nanotechnology, School of Chemistry & Chemical  
9 Engineering, Yantai University, Yantai 264005, China

10 <sup>b</sup> Department of Chemical Engineering, University of Florida, Gainesville, Florida 32611, United  
11 States

12 <sup>c</sup> State Key Laboratory of Bio-Fiber and Eco-textiles, College of Materials Science and Engineering,  
13 Collaborative Innovation Center for Marine Biobased Fibers and Ecological Textiles, Institute of  
14 Marine Biobased Materials, Qingdao University, No. 308 Ningxia Road, Qingdao 266071, PR China

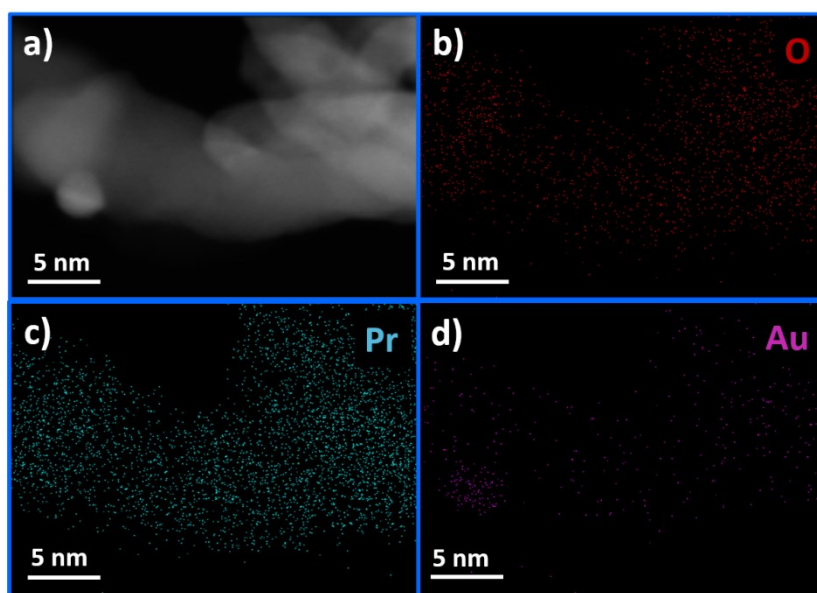

15

16 Figure S1. (a) HAADF-STEM image of Au/PrO<sub>x</sub>-M; (b, c, d) Elemental composition distributions  
17 maps. O (in red), Pr (in blue), Au (in pink).

18

19

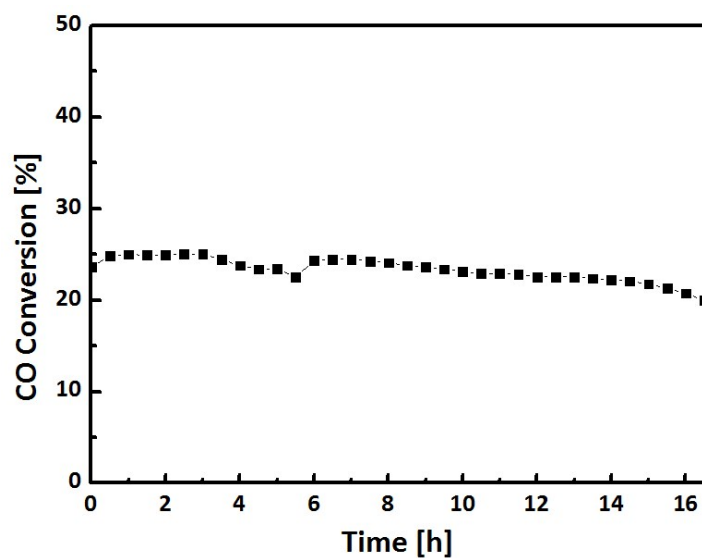

20

21 Figure S2. WGS stability tests over  $\text{Au/Pr(OH)}_x\text{-MDP}$  at  $300^\circ\text{C}$  (2 vol% CO + 10 vol%  $\text{H}_2\text{O}$ ,  $\text{N}_2$   
22 balance,  $m_{\text{catalyst}} = 50$  mg, total flow rate 45 ml/min).

23

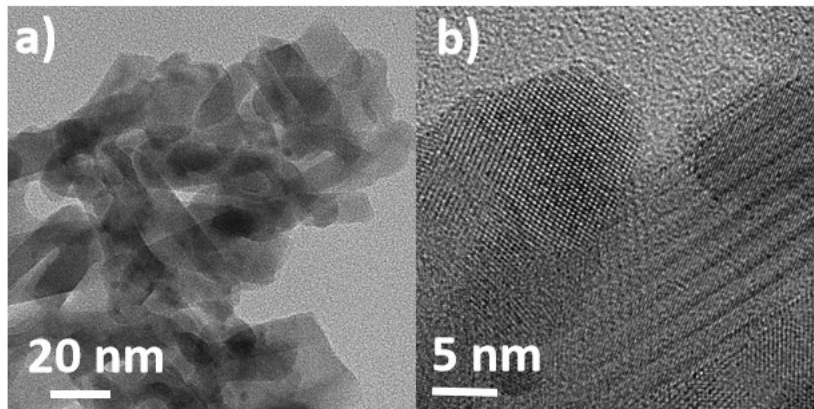

24

25 Figure S3. TEM and HRTEM micrographs of  $\text{Au/Pr(OH)}_x$  (a, b). Sample were used for WGS for more  
26 than 15 h from  $150^\circ\text{C}$  to  $400^\circ\text{C}$  (feed-gas mixture: 2 vol% CO, 10 vol%  $\text{H}_2\text{O}$ ,  $\text{N}_2$  as carrier gas; total  
27 gas flow  $45\text{ mL min}^{-1}$ ).

28

29
